# Supplementary material for: GRHL2 coordinates regeneration of a polarized mucociliary epithelium from basal stem cells
Source: PubMed Central journal article supplement — J Cell Biol. 2015 Nov 9;211(3):669–82. doi: 10.1083/jcb.201506014 (PMC4639861; doi:10.1083/jcb.201506014), 2015-11-09
Supplement: supp_jcb.201506014_JCB_201506014_sm.pdf [file supp_jcb.201506014_JCB_201506014_sm.pdf]

Gao et al., <http://www.jcb.org/cgi/content/full/jcb.201506014/DC1>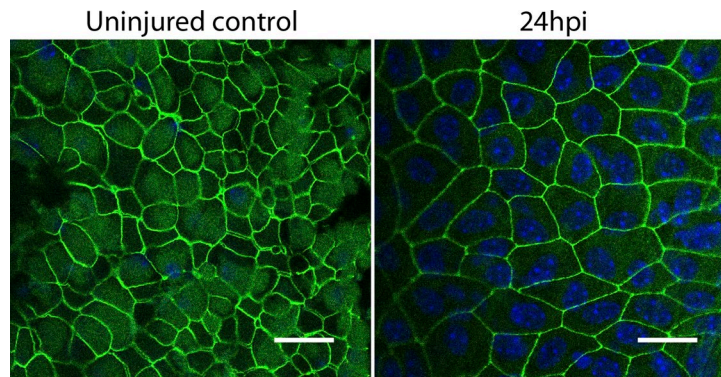

Figure S1. **ZOI is localized between tracheal BCs early during regeneration after loss of luminal cells.** Tracheas from uninjured *Tjp1<sup>tm1Lch</sup>* mice and mice 24 h after exposure to SO<sub>2</sub> were fixed and examined by confocal microscopy without further manipulation. Image is a single optical section near the apical surface. At 24 hpi, many of the squamous epithelial cells express Trp63, a marker of BCs. Bars, 20  $\mu$ m.

*Krt5-CreER; Grhl2 flx/-; Rosa-tdTomato*  
*Krt5-CreER; Grhl2 flx/+; Rosa-tdTomato*  
*Krt5-CreER; Rosa-tdTomato*

0.1mg/gram Tamoxifen  
 4 times through gavage  
 Every other day

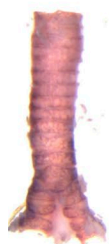

Isolate tracheal  
 epithelium and  
 dissociate

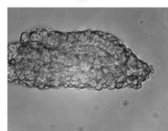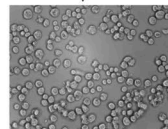

+anti-NGFR

Sort tdTomato+ NGFR+ cells by FACS

Culture in Matrigel

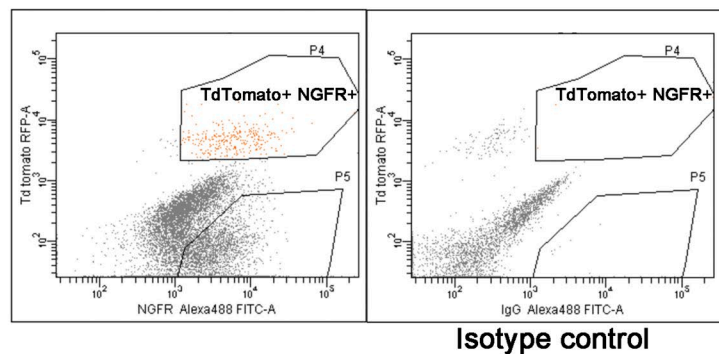

Figure S2. **Isolation of tracheal BCs.** Schematic for timing and dose of Tmx treatment, isolating tracheal epithelium, and FACS sorting lineage-labeled NGFR<sup>+</sup> BCs. Right panel is isotype control for anti-Ngfr.

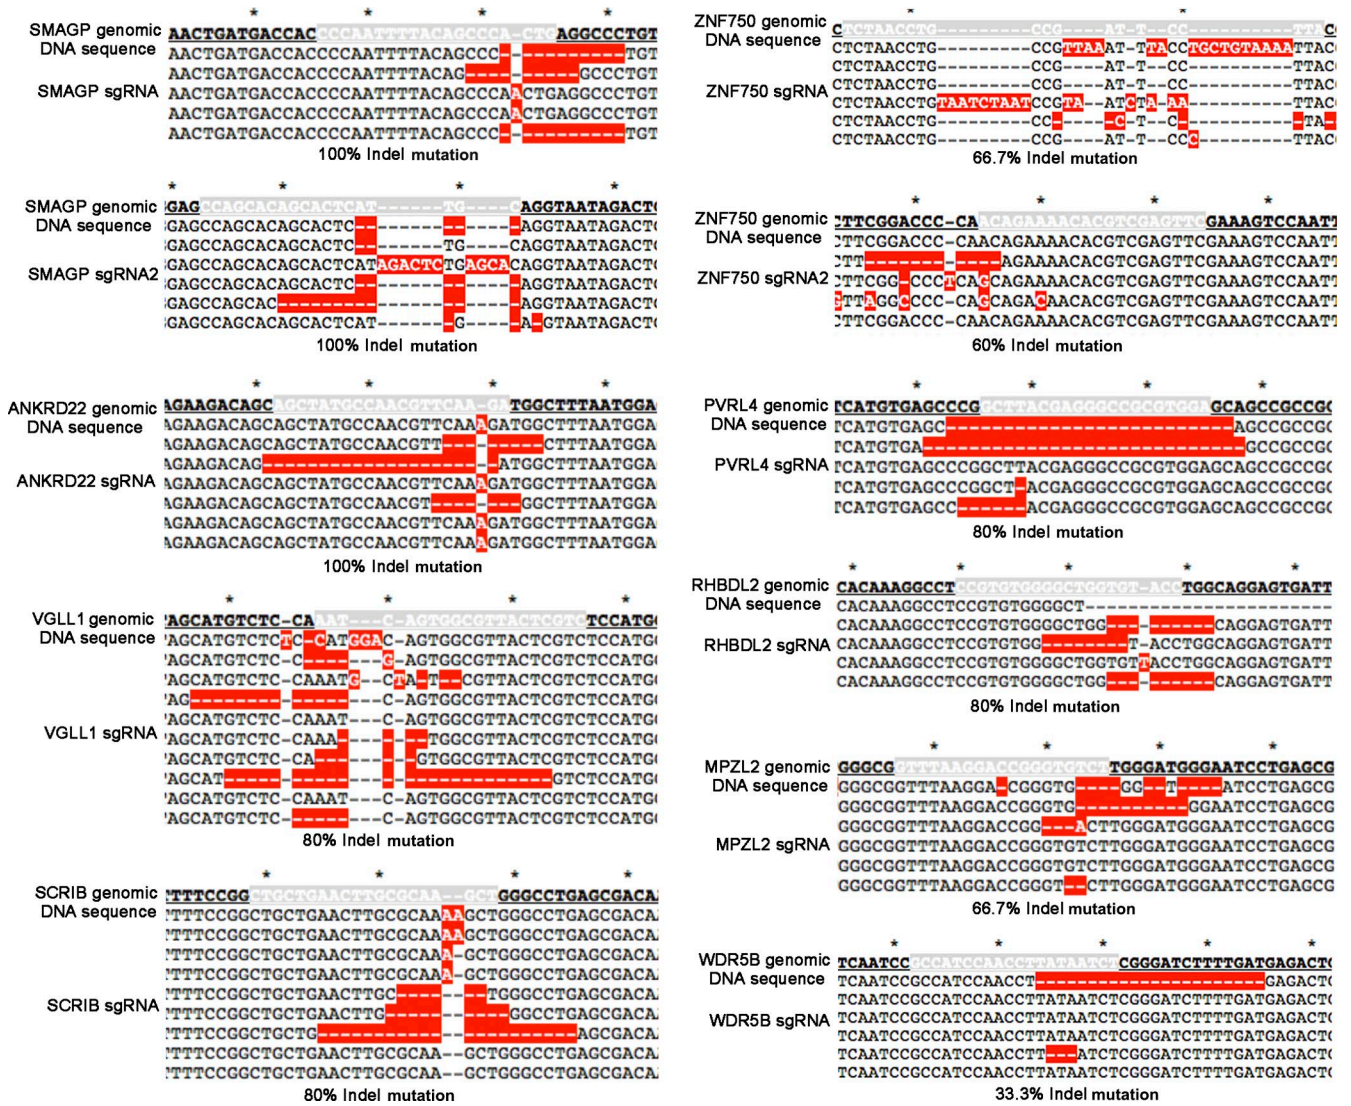

Figure S3. Mutation of potential Grhl2 target genes in HBE cells using CRISPR/Cas9. Cells were transfected with the lentiCRISPR virus-specific target for different genes and selected in puromycin, and genomic DNA was extracted and analyzed as described in Materials and methods (section CRISPR/Cas9 genome editing). The sgRNA region was PCR amplified (for primers, see Table S3) and cloned into a sequencing vector. The red highlights are mismatched, missing, or inserted nucleotides. The asterisks indicate every 10 nucleotides of the genomic sequence.

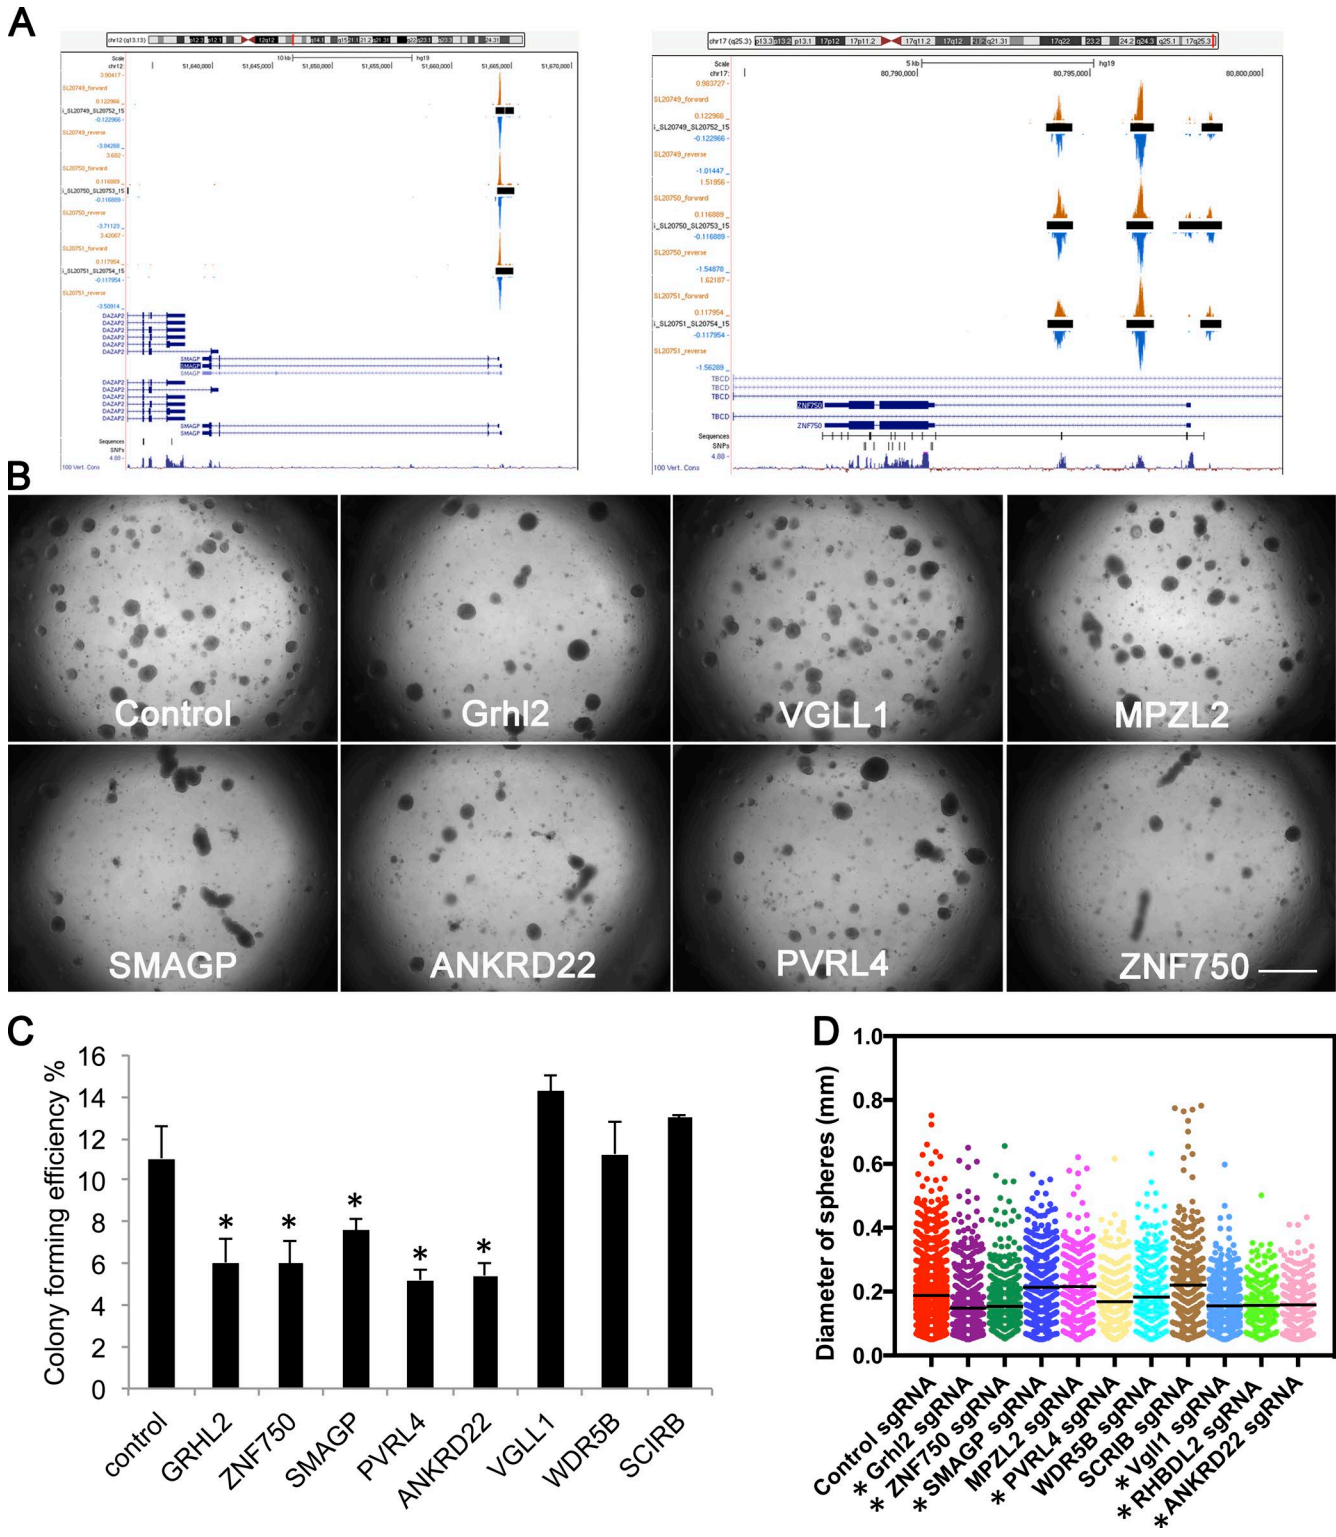

Figure S4. **Functional screening of potential *Grhl2* target genes in HBE cells.** (A) Location of *Grhl2*-binding sites by ChIP-Seq in *SMAG* and *ZNF750* genes in primary HBE cells from three donors (Gao et al., 2013; database located at [http://genome.ucsc.edu/cgi-bin/hgTracks?db=hg19&position=chr7%3A73236989-73255218&hgid=442126887\\_T1bUzLD4IUdWAvl34kwYmOT85zA](http://genome.ucsc.edu/cgi-bin/hgTracks?db=hg19&position=chr7%3A73236989-73255218&hgid=442126887_T1bUzLD4IUdWAvl34kwYmOT85zA)). The sgRNAs for *ZNF750* are located in exon 2. This is also in the intron of the *TBCD* gene on the opposite strand. Control qRT-PCR experiments showed no change in the expression of this gene in sgGRLH2 mutant cells. (B) Representative DIC microscopy images of spheres formed in Matrigel after 21 d from BCs transfected with lentiCRISPR-sgRNA virus. (C and D) The quantification of CFE (C) and the diameters of control and mutant spheres (D) is described in Materials and methods (section HBE cell culture). Spheres were analyzed in triplicate wells from two to three different donors. \*,  $P < 0.05$ . Bar, 2 mm. Horizontal bars represent mean. Data are reported as mean  $\pm$  SEM.

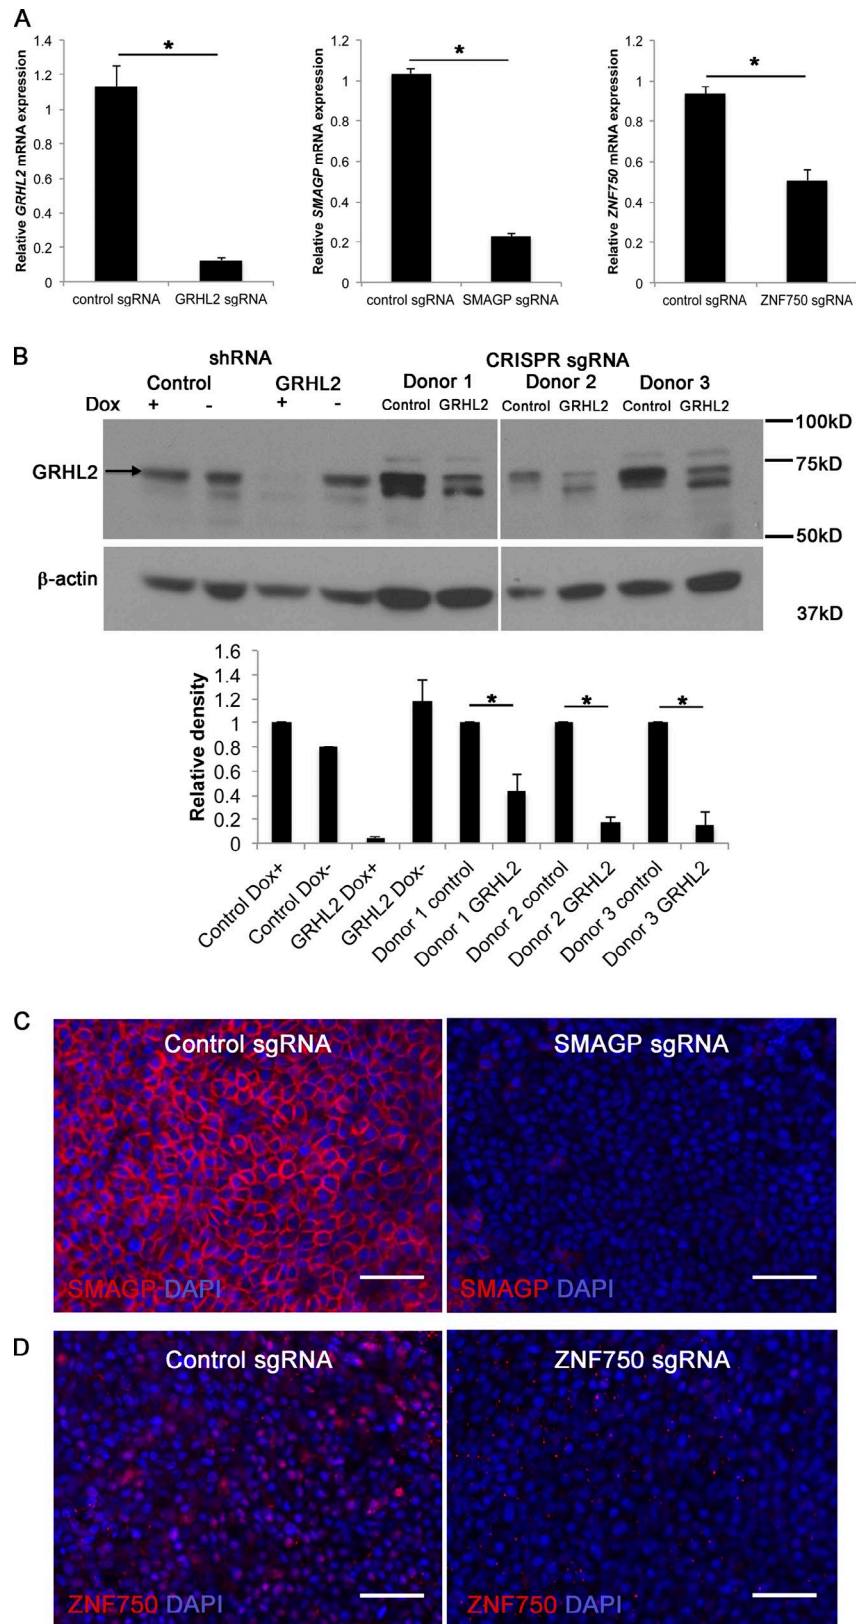

Figure S5. **Evidence that CRISPR/Cas9-induced mutations reduce gene expression levels in HBE cells.** (A) qRT-PCR analysis of *GRHL2*, *ZNF750*, and *SMAGP* RNA in control and mutant cells cultured in ALI for 21 d. Data are averaged from triplicate wells. Data are SEM of triplicates from triplicate samples. \*,  $P < 0.05$ . (B, top) Western blot of extracts of HBE cells from three different donors infected with lentiCRISPR-control and *GRHL2* sgRNA virus. HBE cells infected with a Dox-inducible *GRHL2* shRNA virus were used as a positive control. ACTB is  $\beta$ -actin loading control. (Bottom) The quantification of Western blot (band marked by an arrow). Values are from duplicate blots. \*,  $P < 0.05$ . On average, *Grhl2* protein was reduced 75%. Data are SEM of duplicate experiments. (C) Whole-mount IHC of control and *SMAGP* mutant cultures at ALI culture 21 d for *SMAGP* and DAPI. (D) Whole-mount IHC of control and *ZNF750* mutant cultures at ALI culture 21 d for *ZNF750* and DAPI. Bars, 50  $\mu$ m.

Table S1. The sequences of sgRNA in lentiCRISPR vectors

| Gene names           | sgRNA sequences (5' to 3') |
|----------------------|----------------------------|
| Random control       | ACGGAGGCTAAGCGTCGCAA       |
| <i>GRHL2</i>         | ATCAAACATGTCACAAGAGT       |
| <i>GRHL2</i> sgRNA2  | TCCAGGTTCTCGAGACAAG        |
| <i>SMAGP</i>         | CCCAATTTTACAGCCCACTG       |
| <i>SMAGP</i> sgRNA2  | GCCAGCACAGCACTCATTGC       |
| <i>ZNF750</i>        | TCTAACCTGCCGATTCCCTTA      |
| <i>ZNF750</i> sgRNA2 | GAACTCGACGTGTTTTCTGT       |
| <i>ANKRD22</i>       | AGCTATGCCAACGTTCAAGA       |
| <i>MPZL2</i>         | GGTTTAAGGACCGGGTGTCT       |
| <i>SCRIB</i>         | CTGCTGAACCTTGCACAAGCT      |
| <i>WDR5B</i>         | GCCATCCAACCTTATAATCT       |
| <i>VGLL1</i>         | GACGAGTAACGCCACTGATT       |
| <i>PVRL4</i>         | TCCACGGCCCTCGTAAGC         |
| <i>RHBDL2</i>        | CCGTGTGGGGCTGGTGTACC       |

Table S2. Primers used for qRT-PCR

| Genes              | Forward primer sequence (5' to 3') | Reverse primer sequence (5' to 3') |
|--------------------|------------------------------------|------------------------------------|
| <i>GAPDH</i>       | AGGTCGGTGTGAACGGATTTG              | TGTAGACCATGTAGTTGAGGTCA            |
| <i>Grhl1</i>       | GCTGAGACACTGGAAGTACTG              | CGTGAAGGAAATGGCGTTATAAG            |
| <i>Grhl2</i>       | AAGGAGAGCTTCAACACCATC              | TGTAICTCAGGCAATTCACGG              |
| <i>Grhl3</i>       | CTCTGCTCTTCCCTGATATTCTG            | TGACTCCCCTGCTTTGATG                |
| <i>Trp63</i>       | CCCACAGACTGCAGCATTG                | GAGATGAGGAGGTGAGGAGAAG             |
| <i>Foxj1</i>       | CATCTACAAGTGGATCACGGAC             | GAGCAGGCGCTCTCGTACTG               |
| <i>Scgb3a2</i>     | CCAAAGTCCCGGAAAACATC               | AGGGCAGTGGCAGAATAACC               |
| <i>Mcidas</i>      | CCAGCTCTCACAACCATAGAC              | GCATCTCTGAAATCTCGCAGG              |
| <i>Rfx2</i>        | TCTCTGTGAAATGTGAGCCG               | TCTTGGCGAAGTTCCTGATG               |
| <i>Myb</i>         | CAAGGGAAGAGGATGAGAAGC              | ATGAGTTCAGGGTTCAGCAC               |
| <i>Ccnd1</i>       | GCCCTCCGTATCTTACTTCAAG             | GCGGTCCAGGTAGTTCATG                |
| <i>Notch1</i>      | TCAGGGTGTCTTCCAGATCC               | CAGCATCCACATTGTTCCAC               |
| <i>Notch2</i>      | ATGTGGACGAGTGTCTGTGTC              | GGAAGCATAGGCACAGTCATC              |
| <i>Notch3</i>      | TGCCAGGGAATTTCAAGTG                | AGGCAAGAACAGGAAAAGGAG              |
| <i>Dll1</i>        | CAGGACCTTCTTTCGCGTATG              | AAGGGGAATCGGATGGGGTT               |
| <i>Dll3</i>        | CTGGTGTCTTCGAGCTACAAAT             | TGCTCCGTATAGACCCGGAC               |
| <i>Dll4</i>        | TTCCAGGCAACCTTCTCCGA               | ACTGCCGCTATTCTTGTCCC               |
| <i>Jag1</i>        | CCTCGGGTCAGTTTGAGCTG               | CCTTGAGGCACACTTTGAAGTA             |
| <i>Jag2</i>        | CAATGACACCACTCCAGATGAG             | GGCCAAAGAAGTCGTTGGC                |
| <i>Hay1</i>        | TACCCAGTGCCTTTGAGAAG               | TCCGATAGTCCATAGCCAGG               |
| <i>Hay2</i>        | AGCGAGAACAATTACCCTGG               | TTTATTTCGATCCCGACGCC               |
| <i>HayL</i>        | CGCAGAGGGATCATAGAGAAAC             | CAAGACCTCAGCTTTCTCCAG              |
| <i>Hes1</i>        | GGCGAAGGGCAAGAATAAATG              | GTGCTTCACAGTCATTTCCAG              |
| Homo <i>TBCD</i>   | GATCAGACATCTCCAGCTTCC              | ATCTAAAACAGGCTCTACATCGG            |
| Homo <i>GRHL2</i>  | ATCAAACATGTCACAAGAGTCCG            | CAAGTATGACTTCCAGGCTTC              |
| Homo <i>ZNF750</i> | TCTAACCTGCCGATTCCCTACGG            | TGGATAGACCAGGGTGGCTTCT             |
| Homo <i>SMAGP</i>  | CCCAATTTTACAGCCCACTG               | TGCCTTTGTTCTTGTACAGGT              |
| Homo <i>FoxJ1</i>  | ACGGACAACCTTCTGCTACTTC             | TTGTTTCAGAGACAGGTTGTGG             |
| Homo <i>Rfx2</i>   | CCAGTCCACTACATCGAGAAG              | CTGACACAGGAGATAAGCTTG              |

Table S3. Primers used for amplifying the mutation regions of genomic DNA

| Genes                         | Forward primer sequence (5' to 3')     | Reverse primer sequence (5' to 3')      |
|-------------------------------|----------------------------------------|-----------------------------------------|
| <i>GRHL2</i> sgRNA            | CCGGGATATCGTCGACATCCCACCTTTCCGGCTAGGTG | TACTCTAGAGCGCGCCCTTCTCCCCTTAATCAGGGTAGA |
| <i>GRHL2</i> sgRNA2           | CCGGGATATCGTCGACATGAGAGGTGCTCGGGTCCA   | TACTCTAGAGCGCGCCCTTCTTGACCCCATCTCCTC    |
| <i>SMAGP</i> sgRNA and sgRNA2 | CCGGGATATCGTCGACTTGTCTTTGGGTGGTGGTTTA  | TACTCTAGAGCGCGCCCATTTACTGGTAGTGCCTCTG   |
| <i>ZNF750</i> sgRNA           | CCGGGATATCGTCGACCACTTTTACACAGAGCACGGG  | TACTCTAGAGCGCGCCCGCCAGCCTTGAGAGGTCTTTA  |
| <i>ZNF750</i> sgRNA2          | CCGGGATATCGTCGACGAAACCAAGACCCGAGACA    | TACTCTAGAGCGCGCCGCTTGTGGAGAGTCTGTA      |
| <i>MZPL2</i>                  | CCGGGATATCGTCGACGAAAGCAAGTACAGAGCTGC   | TACTCTAGAGCGCGCCGCTTAACAAAGATTGCCCT     |
| <i>SCIRB</i>                  | CCGGGATATCGTCGACGGCGTGTACCGTGTGTTTC    | TACTCTAGAGCGCGCGCAACTTGATGCTCTCCGGAT    |
| <i>WDR5B</i>                  | CCGGGATATCGTCGACATTTGGGGAGCATATGATGGA  | TACTCTAGAGCGCGCGCAGGAGGGTTATCGTCATCAAC  |
| <i>VGLL1</i>                  | CCGGGATATCGTCGACCTAGAAACAGTACACCTACGG  | TACTCTAGAGCGCGCGAAGGGATGAGAGTAGCCAGG    |
| <i>PVRL4</i>                  | CCGGGATATCGTCGACGACGTGGTAACTGTGGTGC    | TACTCTAGAGCGCGCCCTACCTCTGCCCATCCATCT    |
| <i>RHBDL2</i>                 | CCGGGATATCGTCGACAAAGTCTGTTTATCTCCA     | TACTCTAGAGCGCGCGAGCGCCAGGCATACTTGCAA    |
| <i>ANKRD22</i>                | CCGGGATATCGTCGACTTTCCCGACCCAGCCATCTG   | TACTCTAGAGCGCGCGCTGCTTGGTATGTGTCAGTC    |

## Reference

Gao, X., C.M. Vockley, F. Pauli, K.M. Newberry, Y. Xue, S.H. Randell, T.E. Reddy, and B.L. Hogan. 2013. Evidence for multiple roles for grainyhead-like 2 in the establishment and maintenance of human mucociliary airway epithelium. *Proc. Natl. Acad. Sci. USA*. 110:9356–9361. <http://dx.doi.org/10.1073/pnas.1307589110>
